# Supplementary material for: Molecular characterization of G-protein-coupled receptor (GPCR) and protein kinase A (PKA) cDNA in Perinereis aibuhitensis and expression during benzo(a)pyrene exposure
Source: PeerJ. 2019 Nov 22;7:e8044. doi: 10.7717/peerj.8044 (PMC6876487; doi:10.7717/peerj.8044)
Supplement: Supplemental Information 2 — The data of standard curve and experiment group are both included in this table. The data in line 3 to 5 represent the OD450 value of standard concentration. The data in line 16 to 33 represent the result of experiment group. the PKA concentration in sample was calculated based on the standard curve. [file peerj-07-8044-s002.xls]

## Sheet: PKA content 
standard curve
standard concentration	200ng/ml	100ng/ml	50ng/ml	25ng/ml	12.5ng/ml	0ng/ml
OD450 repeat1	1.744	1.029	0.494	0.288	0.177	0.061
OD450 repeat2	1.569	0.7	0.45	0.266	0.151	0.048
OD450 repeat 3	1.698	1.052	0.563	0.294	0.204	0.068
standard concentration	200	100	50	25	12.5	0
average of OD450	1.67033	0.927	0.502333	0.282667	0.177333	0.059
experiment group	OD450(sample 1)	OD450(sample 2)	OD450(sample 3)	PKA concentration in sample 1(ng/ml)	PKA concentration in sample 2(ng/ml)	PKA concentration in sample 3(ng/ml)		average of PKA concentration in sample	stand deviation of PKA concentration in sample
4d blank control	0.412	0.404	0.406	20.5556	19.8148	20		20.1235	0.385494
4d acetone	0.418	0.425	0.45	21.1111	21.7593	24.0741		22.3148	1.55765
4d 0.5ug/L B(a)p	0.517	0.553	0.475	30.2778	33.6111	26.3889		30.0926	3.61467
4d 5ug/L B(a)p	0.61	0.55	0.52	38.8889	33.3333	30.5556		34.2593	4.24313
4d 10 ug/L B(a)p	0.504	0.53	0.52	29.0741	31.4815	30.5556		30.3704	1.21434
4d 50 ug/L B(a)p	0.491	0.466	0.459	27.8704	25.5556	24.9074		26.1111	1.55765
7d blank control	0.421	0.403	0.42	21.3889	19.7222	21.2963		20.8025	0.936666
7d acetone	0.407	0.428	0.446	20.0926	22.037	23.7037		21.9444	1.80734
7d 0.5 ug/L B(a)p	0.485	0.41	0.453	27.3148	20.3704	24.3519		24.0123	3.48465
7d 5 ug/L B(a)p	0.483	0.432	0.464	27.1296	22.4074	25.3704		24.9691	2.38654
7d 10 ug/L B(a)p	0.449	0.419	0.408	23.9815	21.2037	20.1852		21.7901	1.96491
7d 50 ug/L B(a)p	0.489	0.451	0.43	27.6852	24.1667	22.2222		24.6914	2.76902
14d blank control	0.407	0.434	0.421	20.0926	22.5926	21.3889		21.358	1.25029
14d acetone	0.403	0.445	0.409	19.7222	23.6111	20.2778		21.2037	2.1033
14d 0.5 ug/L B(a)p	0.381	0.472	0.385	17.6852	26.1111	18.0556		20.6173	4.7614
14d 5ug/L B(a)p	0.417	0.415	0.415	21.0185	20.8333	20.8333		20.8951	0.106917
14d 10 ug/L B(a)p	0.451	0.461	0.425	24.1667	25.0926	21.7593		23.6728	1.72066
14d 50 ug/L B(a)p	0.439	0.456	0.472	23.0556	24.6296	26.1111		24.5988	1.52801
